## Small-sized colorectal cancer cells harbor metastatic tumor-initiating cells

Lei Mu<sup>1,2,\*</sup>, Kaiyu Huang<sup>1,2,\*</sup>, Yibing Hu<sup>1,2</sup>, Chang Yan<sup>1,2</sup>, Xiaolan Li<sup>2</sup>, Deding Tao<sup>2</sup>, Jianping Gong<sup>1,2</sup> and Jichao Qin<sup>1,2</sup>

<sup>1</sup>Department of Surgery, Tongji Hospital, Tongji Medical College, Huazhong University of Science and Technology, Wuhan 430030, China

<sup>2</sup>Molecular Medicine Center, Tongji Hospital, Tongji Medical College, Huazhong University of Science and Technology, Wuhan 430030, China

\*These authors have contributed equally to this work

Correspondence to: Jichao Qin, email: jcqin@tjh.tjmu.edu.cn  
Jianping Gong, email: jpgong@tjh.tjmu.edu.cn

Keywords: colorectal cancer; tumor-initiating cells; metastasis; cell size; YAP1

Received: May 10, 2017

Accepted: August 26, 2017

Published: November 11, 2017

Copyright: Mu et al. This is an open-access article distributed under the terms of the Creative Commons Attribution License 3.0 (CC BY 3.0), which permits unrestricted use, distribution, and reproduction in any medium, provided the original author and source are credited.

### ABSTRACT

**Colorectal cancer (CRC) is heterogeneous and contains different-sized cells. Recent studies have shown that tumor-initiating cells (TICs) are involved in cancer initiation, recurrence and metastasis. However, connections between cancer cell size and stem-like properties are largely unknown. Here we purified large- and small-sized CRC cells by fluorescence-activated cell sorting (FACS) based on forward scatter (FSC), and demonstrated that small CRC cells possess higher holoclone- and sphere-forming capacity *in vitro*, tumor-initiating capacity *in vivo* and form more lung metastases compared with large CRC cells. Furthermore, we found that down-regulated YAP1 (yes-associated protein 1) decreased tumor-initiating and metastatic capacity in small CRC cells but not in large CRC cells. More importantly, our results showed that the expression of YAP1 positively correlated with the poor prognosis in CRCs. Collectively, our findings suggest that small CRC cells enrich for metastatic TICs, and YAP1 is one of the potential therapeutic targets of metastatic TICs, the small CRC cells.**

### INTRODUCTION

Colorectal cancer (CRC) is the third most common cause of death from cancer, and CRC patients typically die due to tumor progression and metastatic lesions [1]. CRC is heterogeneous, manifesting variegated cellular morphologies and histopathological presentations. Experimental evidence for the existence of tumor-initiating cells (TICs) with metastatic capacity or metastatic TICs was recently shown in human CRCs [2–5].

CRCs contain different-sized cancer cells, but the regulation of cell size remains poorly understood. The cells possess different sizes when locate in different cell cycle phase during cell cycle progression [6]. In one same cell cycle, the cells in G<sub>0</sub>/G<sub>1</sub> phase are generally

smaller than the cells in S phase, and are much smaller than the ones in G<sub>2</sub>/M phase [7, 8]. However, in different cell cycles, the cells even in same cell cycle phases (i.e., G<sub>0</sub>/G<sub>1</sub> phase) have varied cell sizes [9, 10]. In addition, numerous studies have clearly shown that mammalian adult stem cells are generally smaller than differentiated cells [11–15], however, whether small-sized cancer cells enrich for TICs (i.e., cancer stem cells) is not completely clear, particularly in CRCs.

Metastasis involves a multi-step process known as the invasion-metastasis cascade, which involves the outgrowth of the local primary tumors, intravasation of these tumor cells into the circulatory system and extravasation through vascular walls into the parenchyma of distant tissues [16, 17]. In the above events, the local primary cancer cells need to undergo both intravasation

and extravasation and thereby enter into the parenchyma of distant tissues, and small-sized cancer cells are considered to easily pass through either blood or lymphatic vessels due to their cell size. However, whether small-sized cancer cells are prone to metastasize is also unknown. Herein, we separate CRC cells into the subpopulations of large- and small-sized cells, and investigate whether small-sized CRC cells possess cancer stem-like properties and metastatic capacity.

## RESULTS

### Different-sized CRC cells can be prospectively sorted out using FACS

In order to determine whether CRC cells are able to sort out different-sized cells, we first measured the size of the cultured cells in widely used CRC cell lines, e.g. HCT116, SW480, LoVo and HT-29. As demonstrated in Figure 1A, the intratumor heterogeneity of cell size in LoVo and HT29 cells is high, and the two cell lines were thus used to sort out the large and small cells in subsequent experiments. Furthermore, recent studies have shown that patient-derived xenografts may retain the heterogeneity of their originating tumors, we also used one established patient-derived CRC xenografts (xhCRC) in our lab, which derived from a female patient with Duke C colorectal adenocarcinoma [18–20].

To separate large and small CRC cells (i.e., LoVo and HT29), we used fluorescence-activated cell sorting (FACS) to purify out the top 15% (i.e., large cells) and bottom 15% CRC cells (i.e., small cells) based on the value of Forward scatter (FSC), which measures the size of the cells (Figure 1B and 1C). To purify out large and small xhCRC cells, we first processed the xenograft tumors into single cell suspensions, and then sorted out two cell subpopulations (i.e., EpCAM<sup>+</sup>FSC<sup>high</sup> and EpCAM<sup>+</sup>FSC<sup>low</sup>). The purity of large and small cells was ~97% and ~94% upon 3 cycles of sorting, respectively (Figure 1C). In order to further confirm that the purity of large and small cells, we observed the morphology and measured the diameters of the sorted cells under microscope. As shown in Figure 1D and 1E, the diameters of sorted large cells were significantly different from the ones of sorted small CRC cells ( $P<0.001$ ). These results clearly indicate that purified large and small CRC cells are capable of being prospectively sorted out using FACS.

### Purified small CRC cells enrich for TICs

To test whether purified small CRC cells possess higher self-renewing capacity, we performed clonal culture. Purified small CRC cells (i.e., LoVo, HT-29 and xhCRC) formed more holoclones than the isogenic large cells (Figure 2A and 2B), suggesting that small CRC cells may harbor more tumor-initiating cells since holoclones

were shown to enrich for CSCs [21]. In addition, we further conducted sphere formation assays for sorted large and small CRC cells. Purified small CRC cells formed more and larger spheres than the corresponding large cells (Figure 2C and 2D). Our results demonstrate that small cells exhibit higher self-renewing capacity *in vitro* than large CRC cells.

To investigate whether small CRC cells enrich for TICs, we conducted limiting dilution assays (LDAs). Expectedly, purified small LoVo cells demonstrated higher tumor-generating capacity (Table 1) ( $P<0.001$ ). And furthermore, purified small LoVo cells developed larger tumors than large cells (Figure 2E–2G and Supplementary Figure 1). Together, our findings indicate that small CRC cells possess higher tumor-initiating capacity than large cells.

### Small CRC cells are more quiescent and highly express CD133

Studies have shown that TICs or CSCs may be more quiescent than committed differentiated cells [22–24]. To test whether sorted small-sized CRC cells are more quiescent, we performed cell-cycle analysis using FACS. We found that the percentage of small CRC cells in S and G<sub>2</sub>/M phases is smaller than the corresponding large CRC cells (Figure 3A and 3B), suggesting that small CRC cells enrich for quiescent cells. Recent studies have also shown that cell surface marker CD133 is used to prospectively enrich CSCs in CRC [20, 25, 26], therefore, we examined the expression of CD133 in purified small and large CRC cells using western blotting (Figure 3C), RT-qPCR (Figure 3D) and FACS (Figure 3E). Our results showed that, when compared to the large CRC cells (i.e., LoVo and HT-29 cells), small CRC cells expressed higher CD133 than the corresponding large CRC cells at the mRNA and protein level.

Collectively, these results suggest that purified small CRC cells are more quiescent and highly express CD133 at the mRNA and protein level.

### Small CRC cells possess high metastatic capacity

Recent studies have shown that TICs may also harbor metastatic cells [27–29], furthermore, small cells may be more easily to pass through the blood and lymphatic vessels due to their sizes. To evaluate whether small CRC cells possess higher metastatic capacity than the corresponding large cells, we first performed transwell invasion assay for sorted small and large CRC cells (i.e., LoVo, HT-29 and xhCRC). Interestingly, small CRC cells possessed higher invasion capacity than the isogenic large cells (Figure 4A and 4B).

Next, we examined metastatic potential using injection of purified small and large LoVo cells into tail veins of female NOD/SCID mice. Consistent with

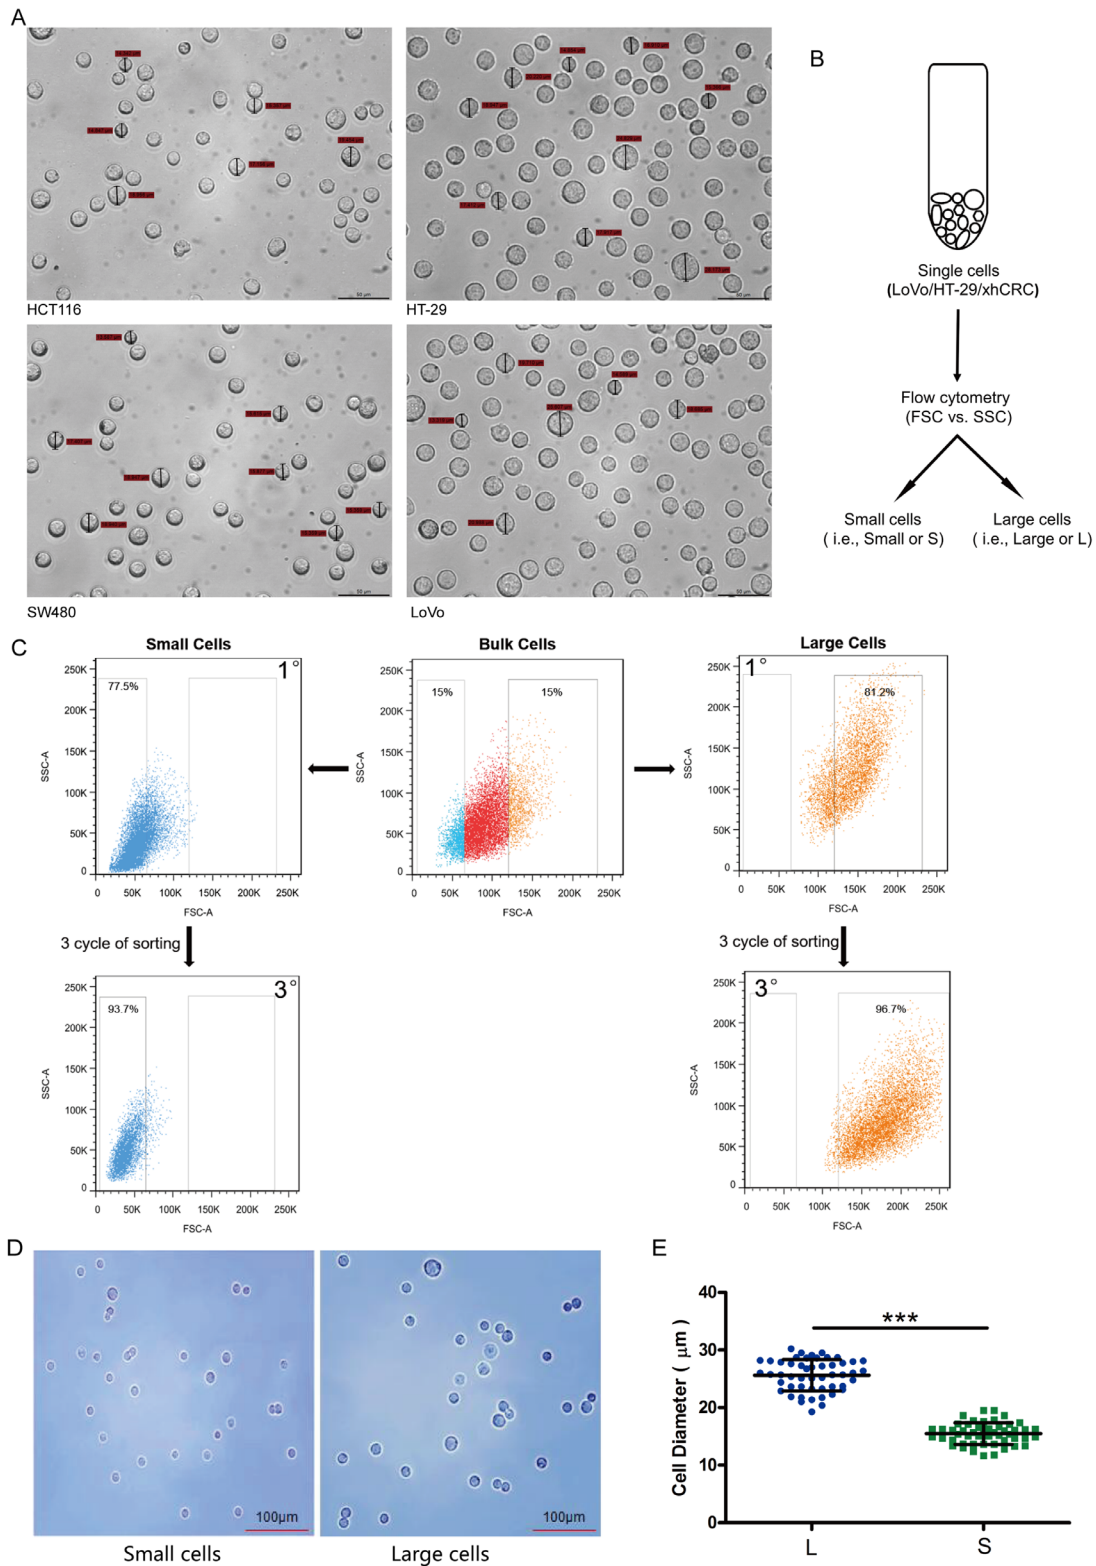

**Figure 1: Large and small CRC cells can be prospectively sorted out by fluorescence-activated cell sorting (FACS).** (A) Cell size of the cultured cells in CRC cell lines (i.e., HCT116, SW480, LoVo and HT-29) was measured under microscope. (B) Schematic of large and small CRC cells sorting. (C) Post-sorting analysis of the sorted large and small CRC cells. (D) Sorted cells were plated on glass cover slides and cell morphology was observed under microscope. (E) Diameters of sorted large cells (i.e., L) and small cells (i.e., S) were measured under microscope. Data are presented from triple experiments; mean  $\pm$  SD, \* $P < 0.05$ , \*\* $P < 0.01$ , \*\*\* $P < 0.001$ .

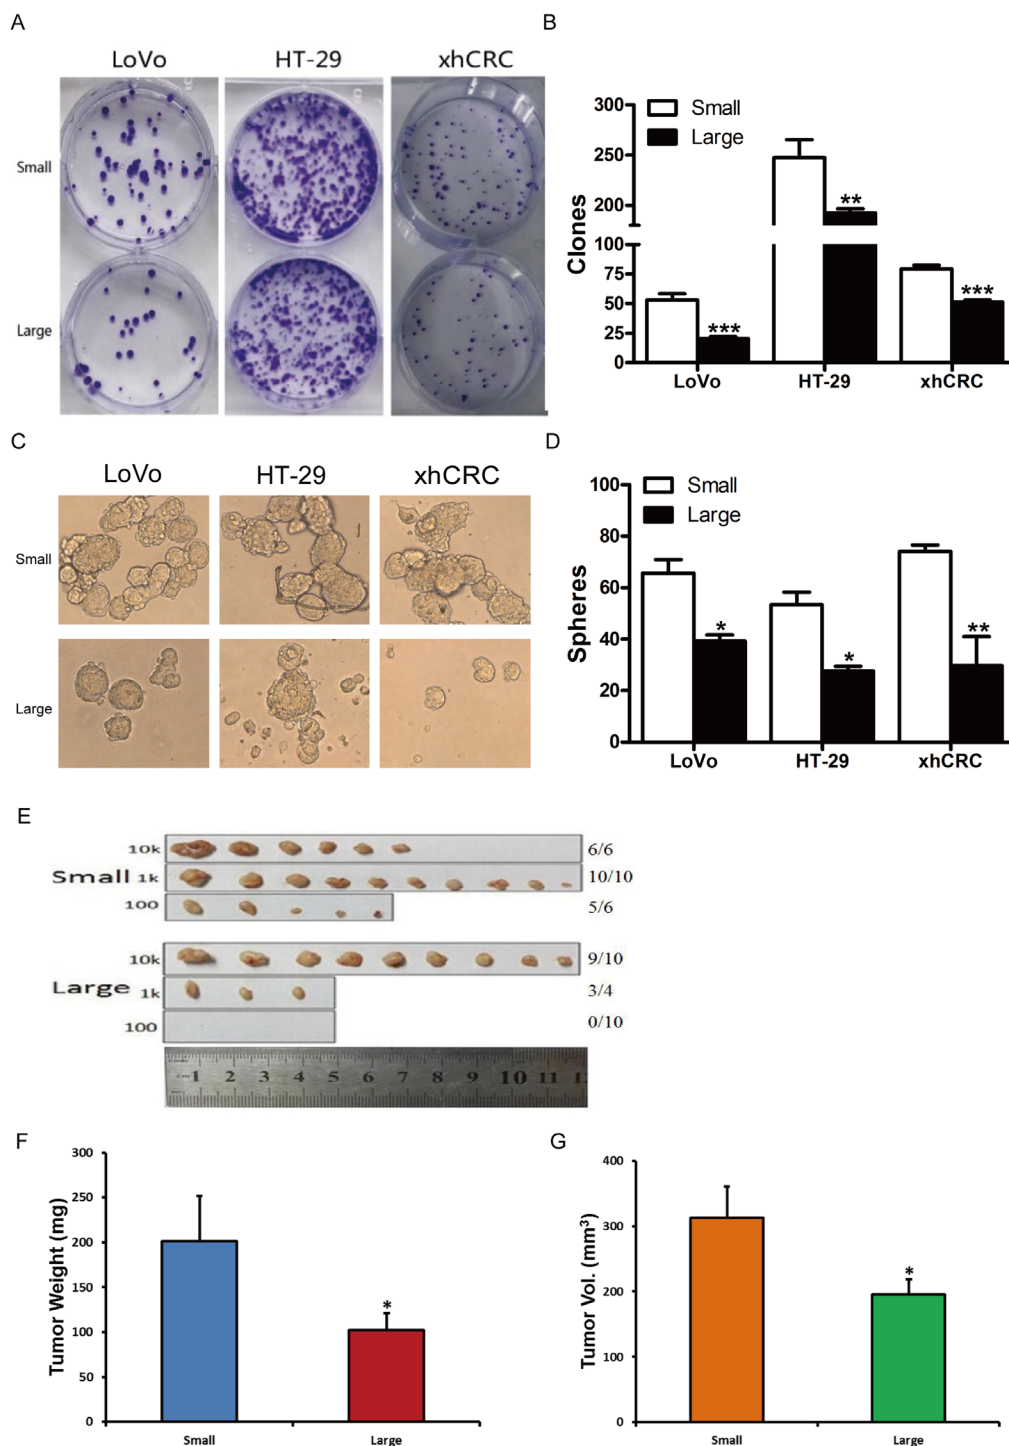

**Figure 2: Small cells possess higher self-renewal than corresponding large cells in CRC.** (A-B) Clonal culture for sorted cells. Large- and small-sized subpopulations were sorted out in LoVo, HT-29 and xhCRC cells, and seeded in the plates. Holoclones were stained by 0.1% Crystal violet, and then photographed (A) and counted (B) 10 days later. Data are presented from three separate experiments. (C-D) Sphere formation assays for sorted cells. Large- and small-sized subpopulations were sorted out in LoVo, HT29 and xhCRC cells, and cultured in ultra-low attachment plates with stem cell medium. Spheres were photographed (C) and counted (D) 7 days later. Data are presented from three separate experiments. (E-G) Small LoVo cells possess higher tumorigenicity. Sorted large and small LoVo cells were injected subcutaneously into BALB/c-nu female mice at 100, 1000, 10,000 cells per injection. 6 weeks after implanting, tumors were harvested. Tumor images, tumor incidence (E), tumor weights (F) and volumes (G) were shown. Data are presented as means  $\pm$  SD, \* $P < 0.05$ , \*\* $P < 0.01$ , \*\*\* $P < 0.001$ .

**Table 1: Tumor-Initiating frequency of large and small CRC cells in Balb/c-nu mice**

| Cells | 10k  | Cell dose |      | Tumor-initiating frequency<br>(95% interval) <sup>a</sup> | P value  |
|-------|------|-----------|------|-----------------------------------------------------------|----------|
|       |      | 1k        | 100  |                                                           |          |
| LoVo  |      |           |      |                                                           |          |
| Small | 6/6  | 10/10     | 5/6  | 1/141(1/48-413)                                           | 8.79e-12 |
| Large | 9/10 | 3/4       | 0/10 | 1/8470(1/3547-15593)                                      |          |
| HT-29 |      |           |      |                                                           |          |
| Small | 9/10 | 5/6       | 0/6  | 1/2468(1/1038-5871)                                       | 0.242    |
| Large | 9/10 | 2/10      | 0/6  | 1/4454(1/2238-8865)                                       |          |

Note. Purified large and small CRC cells were implanted subcutaneously in female Balb/c-nu mice and all tumors were harvested 6 weeks post-implantation.

<sup>a</sup> Tumor-initiating frequency was determined using Bioinformatics Division ELDA analyzer (<http://bioinf.wehi.edu.au/software/elda/index.html>).

the findings in transwell invasion assay, small LoVo cells initiated more lung metastatic lesions than the corresponding large cells in NOD/SCID mice (Figure 4C and 4D), and furthermore, immunostaining confirmed that the metastatic cells were positive for CRC epithelial markers such as CK20 and EpCAM (Figure 4C). Interestingly, we found that only small LoVo cells-initiated subcutaneous tumors generated lung metastatic lesions, while large LoVo cells-initiated subcutaneous tumors failed to form metastatic lesions (Figure 4E and 4F).

Overall, these results clearly demonstrate that small CRC cells possess higher metastatic capacity than the corresponding large cells.

### YAP1 regulates self-renewing capacity and metastatic potential in small CRC cells

Numerous studies have shown that multiple signaling pathways are involved in regulation of cell size, such as mTOR, Myc and Hippo signaling pathway [30–33]. However, Yap1 plays a significant role to mediate the cross-linking of Hippo and PI3K-TOR signaling pathways [34]. To explore whether YAP1 mediates the regulation of cell size in CRC cells, we first examined the expression of YAP1 in purified large and small CRC cells using western blotting and RT-qPCR analysis. Our findings revealed that purified small CRC cells (i.e., LoVo and HT-29 cells) expressed higher YAP1 than the large CRC cells at the protein (Figure 5A) and mRNA level (Figure 5B). We further applied RNAi-mediated approach to investigate whether YAP1 regulated the self-renewing capacity of small CRC cells. Knockdown of YAP1 in LoVo, HT29 cells was confirmed by western blotting (Figure 5C). Intriguingly, knockdown of YAP1 in purified small CRC cells (i.e., LoVo and HT-29 cells) inhibited holoclone-forming (Figure 5D and 5E) and sphere-forming capacity (Figure 5F and 5G) while there was no significant

difference upon knocking down of YAP1 in purified large CRC cells. Moreover, parallel to YAP1 knock-down experiments, after treated with the YAP-TEAD inhibitor Verteporfin, holoclone- and sphere-forming capacity of small HT-29 and LoVo cells was significantly decreased, while there was no effect on that of corresponding large cells (Supplementary Figure 2). Importantly, consistent with *in vitro* results, purified small LoVo, HT29 cells displayed decreased tumor weight whereas there was no significant difference in purified large LoVo, HT29 cells upon knocking down of YAP1 (Figure 5H and 5I). These results indicate that YAP1 may increase the self-renewing capacity of small CRC cells whereas has no effects on that of large CRC cells.

To investigate whether YAP1 mediate the metastatic potential, we first performed transwell invasion assay. Interestingly, knockdown of YAP1 significantly inhibited the migration capacity of small LoVo cells whereas had no effects on that of large LoVo cells (Figure 6A and 6B). Next, we further conducted the metastatic experiments for large and small LoVo cells. Consistent with the *in vitro* findings, small LoVo cells formed much less metastatic lesions upon knocking down of YAP1 whereas knockdown of YAP1 had no significant effects on large LoVo cells at metastatic potential (Figure 6C and 6D). In support of the point that epithelial-mesenchymal transition (EMT) is closely associated with metastasis of tumor cells [35], we found that in small LoVo cells not large cells, knockdown of YAP1 down-regulated the expression of vimentin, a key EMT protein (Figure 6E). We finally explored the correlation between the expression of YAP1 in tumors and clinical outcome in CRC patients. Using R2 database, we found that expression of YAP1 positively correlated with poor prognosis in CRCs (Figure 6F).

Together, our findings clearly reveal that down-regulated of YAP1 decreases self-renewing capacity and

metastatic potential in small CRC cells and positively correlates with poor prognosis in CRC.

## DISCUSSION

In the present study, our findings show that, at least in two widely used CRC cell lines (i.e., LoVo and HT-29 cells) and one PDX (i.e., xhCRC), small-sized CRC cells enrich for TICs or CSCs, possess higher metastatic capacity than the corresponding large-sized cells.

Importantly, our results show that YAP1 is responsible to regulate the self-renewing capacity and metastatic potential of small CRC cells while it has little effects on the corresponding large CRC cells. And interestingly, our findings also show that YAP1 positively correlates with the poor prognosis in CRCs.

Currently, most of the studies use flow cytometry to sort out the different-sized cells [36–38]. This tactic has both pros and cons [38, 39]. The sorting gate may involve false positive and negative results, as a minor portion of

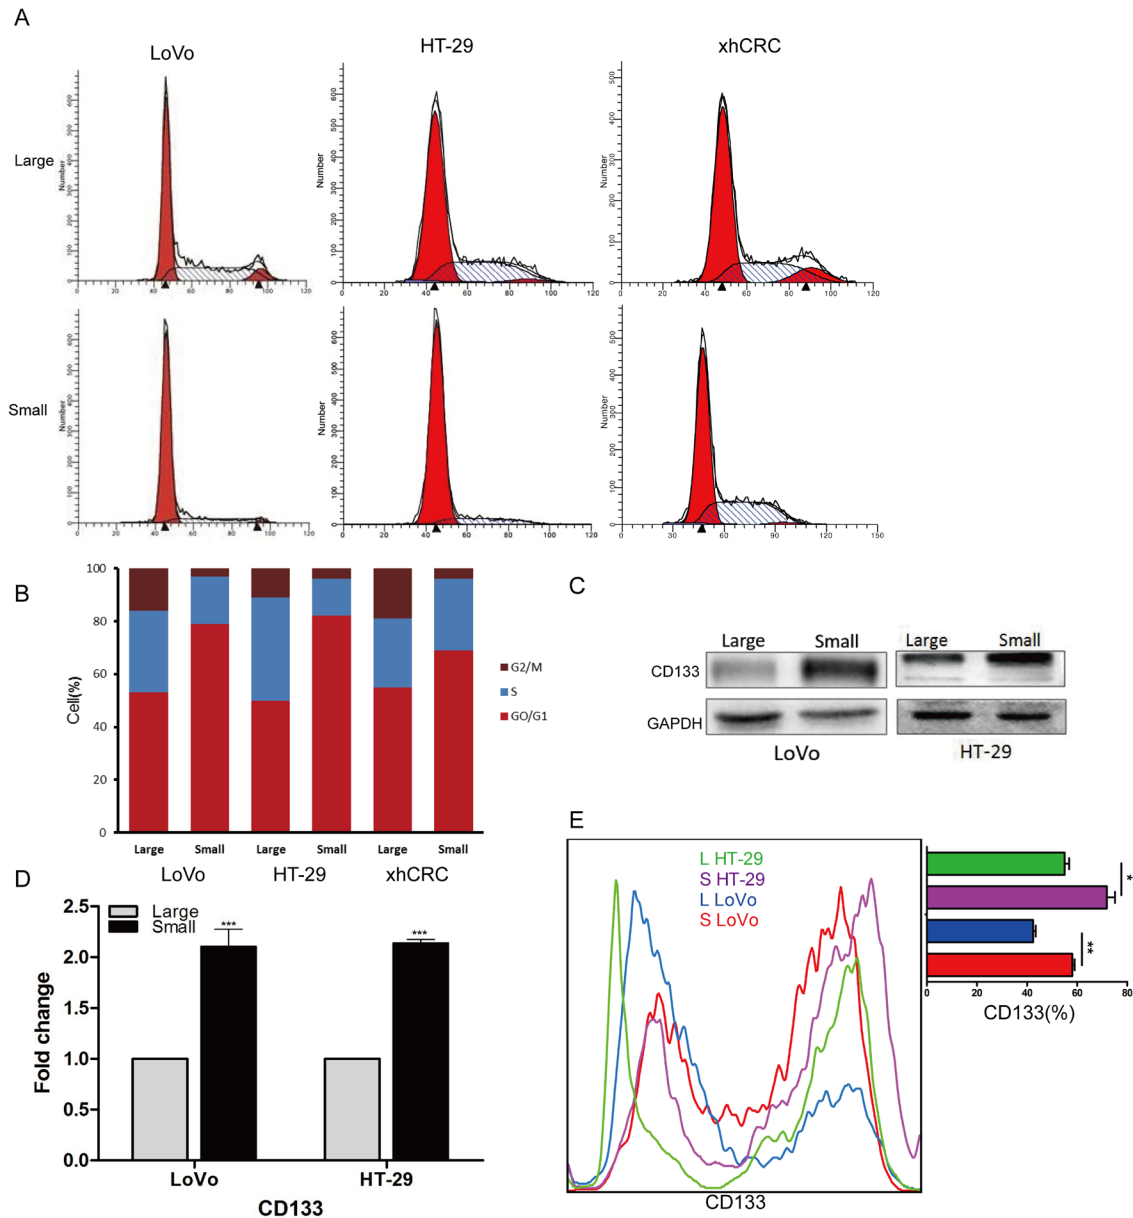

**Figure 3: Small cells are slow-cycling cells, express CD133.** (A-B) Cell cycle analysis of large and small cells. Small CRC cells (i.e., LoVo, HT29 and xhCRC) exhibit a higher percentage of cells in G0/G1 phase, while a lower percentage of S and G2/M phase than the large CRC cells. (C-D) Expression of CD133 in large and small cells was detected by western blotting and RT-qPCR. GAPDH was used as a loading control. (E) Expression of CD133 in large and small cells was analysis by FACS. Data are presented from triple experiments; mean  $\pm$  SD, \* $P < 0.05$ , \*\* $P < 0.01$ , \*\*\* $P < 0.001$ .

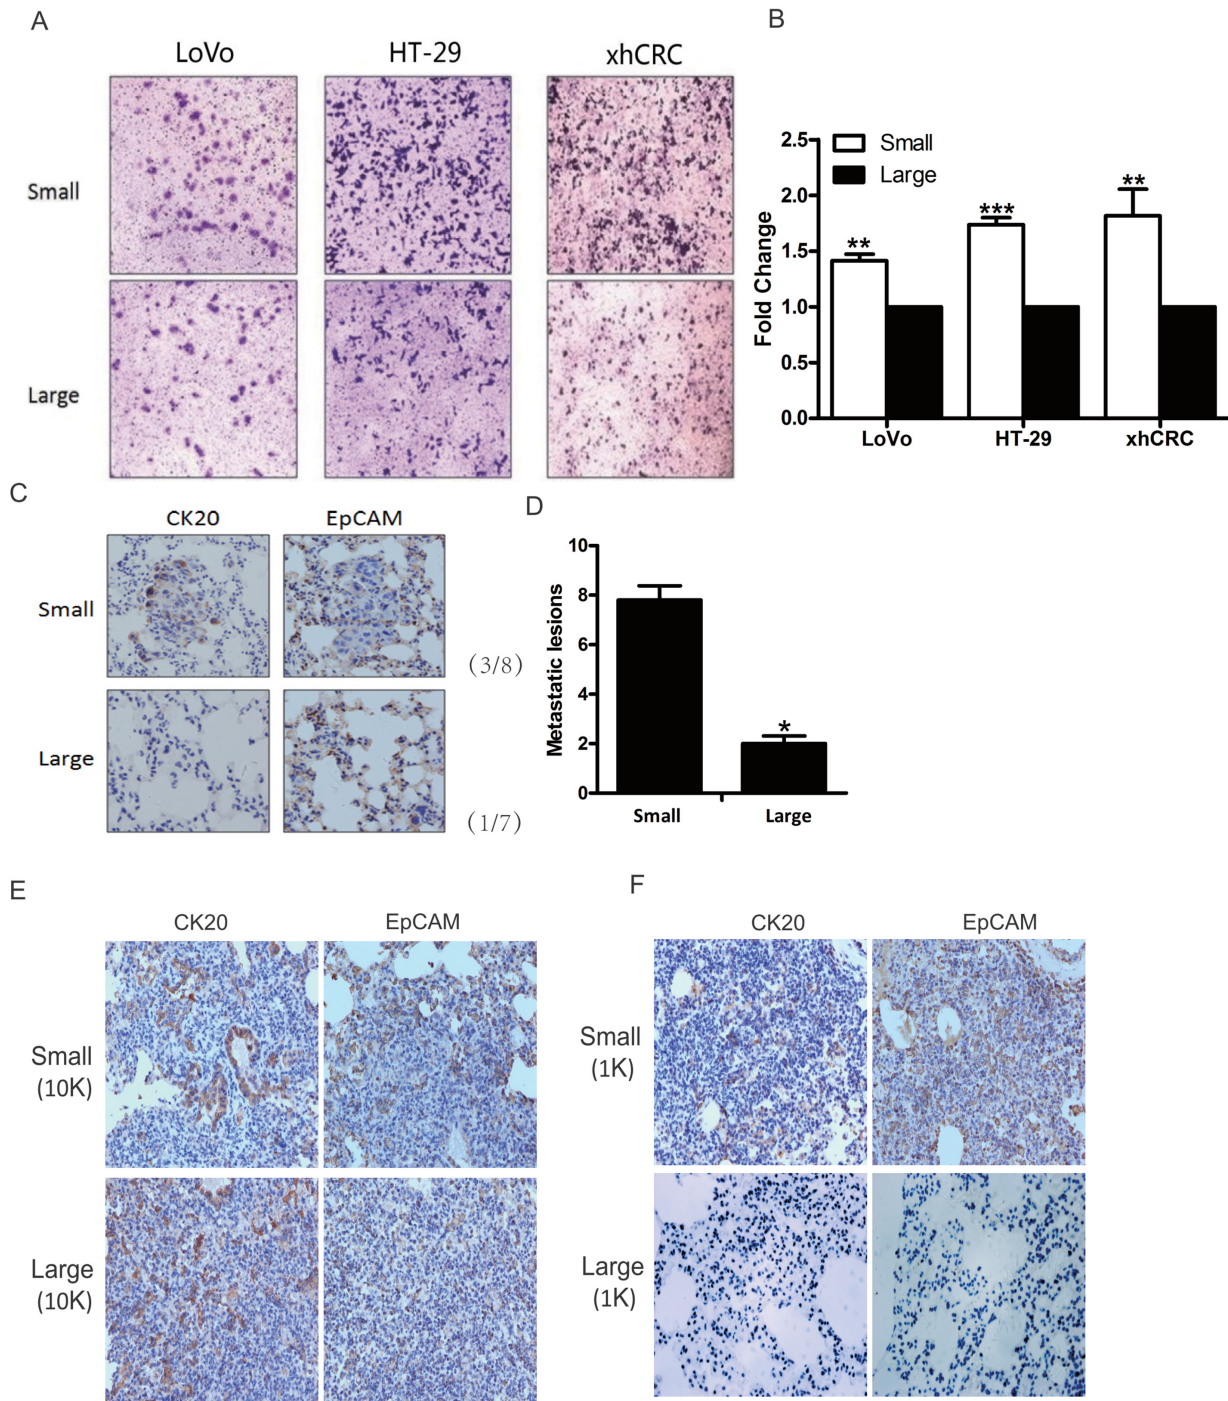

**Figure 4: Small CRC cells possess higher metastatic capacity.** (A-B) Transwell assays. Large- and small-sized subpopulations were sorted out in LoVo, HT-29 and xhCRC cells, and seeded in transwell inserts covered with Matrigel. After 24 hours, cells migrated through Matrigel barrier were photographed (left panel) and calculated (right panel). Scale bars: 100  $\mu$ m. Data are presented from triple experiments. (C-D) Sorted large and small LoVo cells were injected into the tail vein of NOD/SCID mice (n=6 per group). 8 weeks later, animals were sacrificed for examining metastatic lesions in the lungs. Expression of CK20 and EpCAM in metastatic lesions was examined by immunohistochemistry staining. Scale bars: 100  $\mu$ m. (E-F) Purified large and small LoVo cells were implanted subcutaneously into BALB/c-nu female. 6 weeks later, the mice were sacrificed for harvesting the lungs to examine metastatic lesions. Implanted at 10K cell dose, both large and small LoVo cells formed metastatic lesions in the lungs of the mice, while at 1K cell dose, only small LoVo cells formed lung metastatic lesions. Expression of CK20 and EpCAM in metastatic lesions was confirmed by immunohistochemistry staining. Scale bars: 100  $\mu$ m. (Mean  $\pm$ SD, n =5, \*P< 0.05, \*\*P< 0.01, \*\*\*P< 0.001)

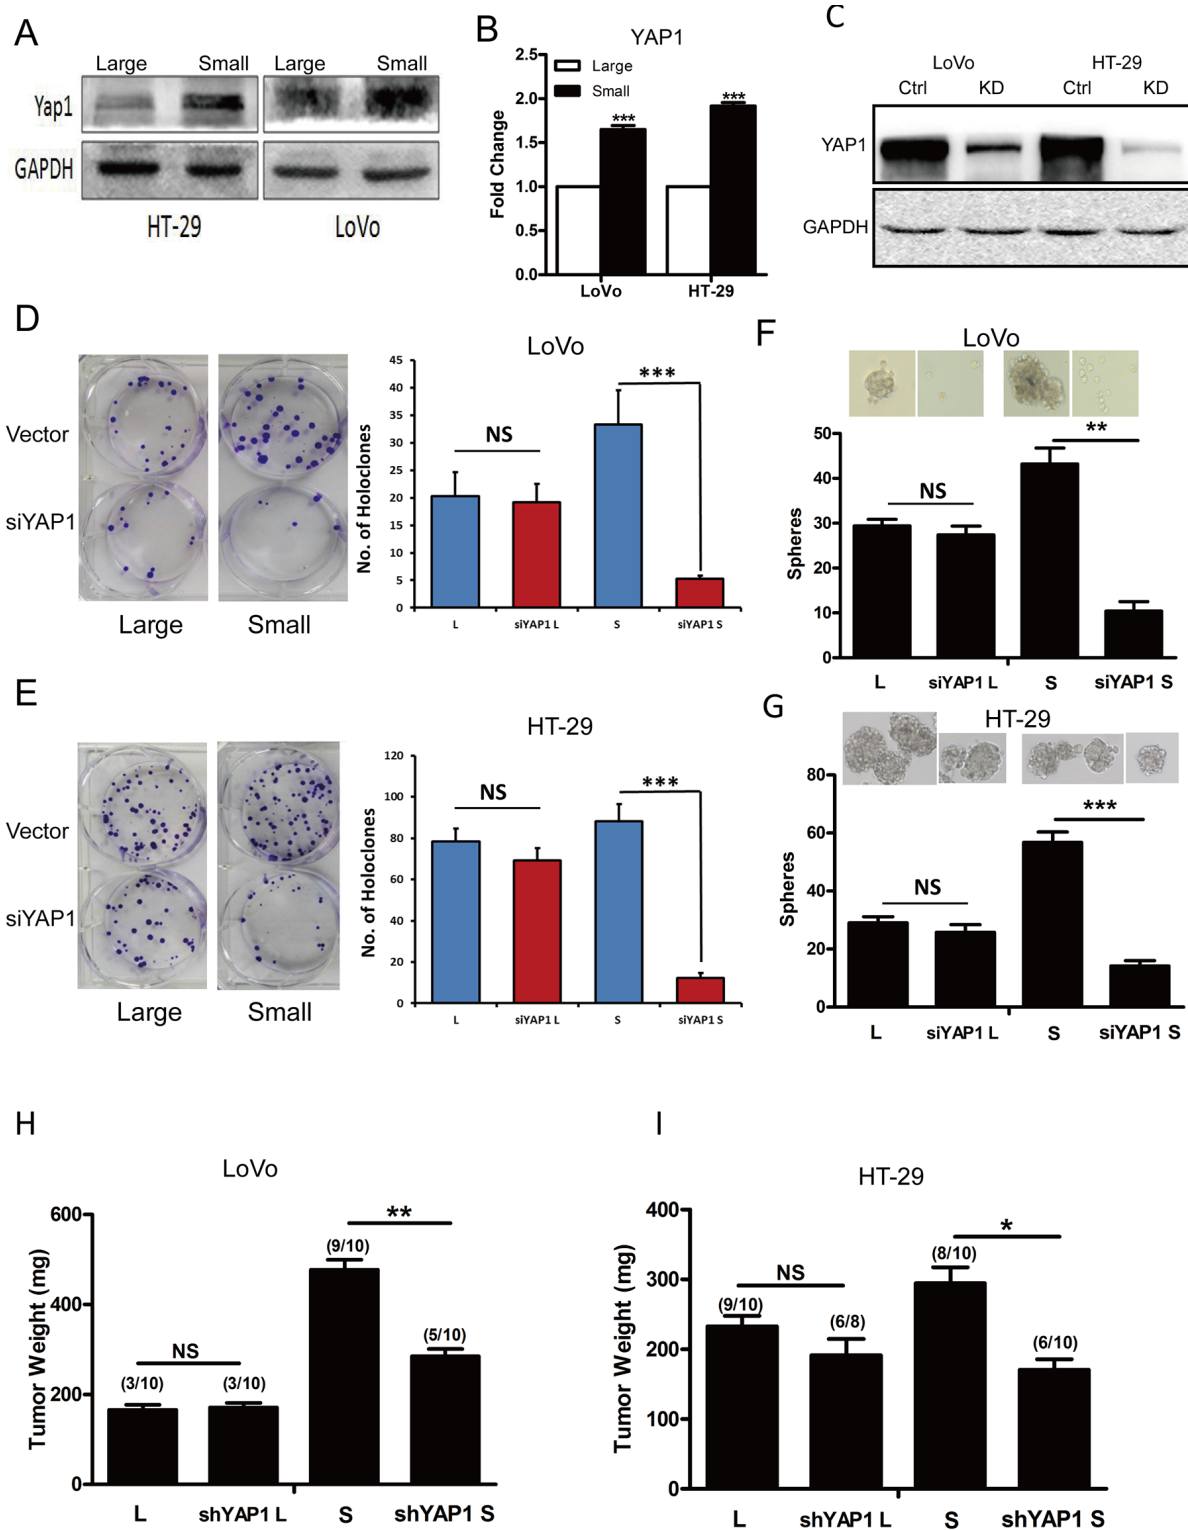

**Figure 5: Down-regulation of YAP1 decreased holoclone-, sphere-forming capacity and invasive capacity in small CRC cells.** (A-B) Expression of YAP1 in large and small LoVo, HT-29 cells was detected by western blotting (A) and RT-qPCR (B). GAPDH was used as a loading control. Data are presented from triple experiments. (C) Knockdown of YAP1 in LoVo, HT-29 cells was measured by western blotting. GAPDH was used as a loading control. Data are presented from triple experiments. (D-E) Clonal culture for large and small LoVo (D), HT-29 (E) cells upon knocking down of YAP1. (L denotes large CRC cells, S denotes small CRC cells). Data are presented from triple experiments. (F-G) Sphere formation assay for large and small LoVo (F), HT-29 (G) cells upon knocking down of YAP1. Data are presented from triple experiments. (H-I) Tumor transplantation for large and small LoVo (H), HT-29 (I) cells upon knocking down of YAP1. Shown are tumor weights and incidence. Mean  $\pm$  SD, \* $P$  < 0.05, \*\* $P$  < 0.01, \*\*\* $P$  < 0.001.



small cells may be cell debris, and large cells may contain few adherent cells, in order to avoid these problems, we chose optimal gate more intuitively, used cell strainer to remove adherent cells, stained cells with propidium iodide to distinguish dead cells. Using forward scatter could be the indirect way to measure cell size and sort out large and small cells conveniently without fluorescent stain, but different flow cytometry machine may provide different detecting results. Consequently, we increased the purity by multiple sorting and confirmed the given sorted cells under microscope (Figure 1C–1E).

CRCs contain different-sized cancer cells, the cells located in different cell cycle phase possess different cell sizes during cell cycle progression [10]. In same cell cycles, the cells in  $G_0/G_1$  phase are generally smaller than those in S phase, and are much smaller than the ones in  $G_2/M$  phase. And moreover, in different cell cycles, the cells even in same cell cycle phases have varied cell sizes. Consistent with this point, in the current study, our results clearly demonstrated that some of small CRC cells located in  $G_0/G_1$ -phase cells, and some of them were  $G_2/M$ -phase cells although the percentage of  $G_0/G_1$ -phase cells was larger than that in large CRC cells, implying that there are other factors regulating the cell size besides cell cycle.

The relationship between cell size and stemness has been of great interest to researchers. Generally, stem cells are more quiescent, possessing the capacity for self-renewal and the multilineage potential [40], and cell division is associated with cell size and age [41]. In our study, we find that the small CRC cells can form more holoclones and spheres, as well as display higher stem cell frequencies in limiting dilution assays (Figure 2), suggesting that small cells harbor more TICs. This is in agreement with another study that small cells in the human epidermoid carcinoma cell line A431, which derived from non-adherent spheres, exhibited a stronger ability to form spheres and higher tumorigenicity in mice [42]. In addition, we found that more small CRC cells were in the  $G_0/G_1$  phase (Figure 3A and 3B), a relatively quiescent state. Similarly, in human corneal epithelial cells, small-sized cells retained more BrdU in label-retaining assay, implying that the cells are more quiescent [43]. Moreover, we and others have identified that the stem cell markers CD133 can be used to enrich CSCs [20], here, at the mRNA and protein level, we observed that small CRC cells preferentially express CD133 (Figure 3C–3E).

Recent discoveries have provided supports that TICs take part in metastasis [29]. Nuclear rupture [44]

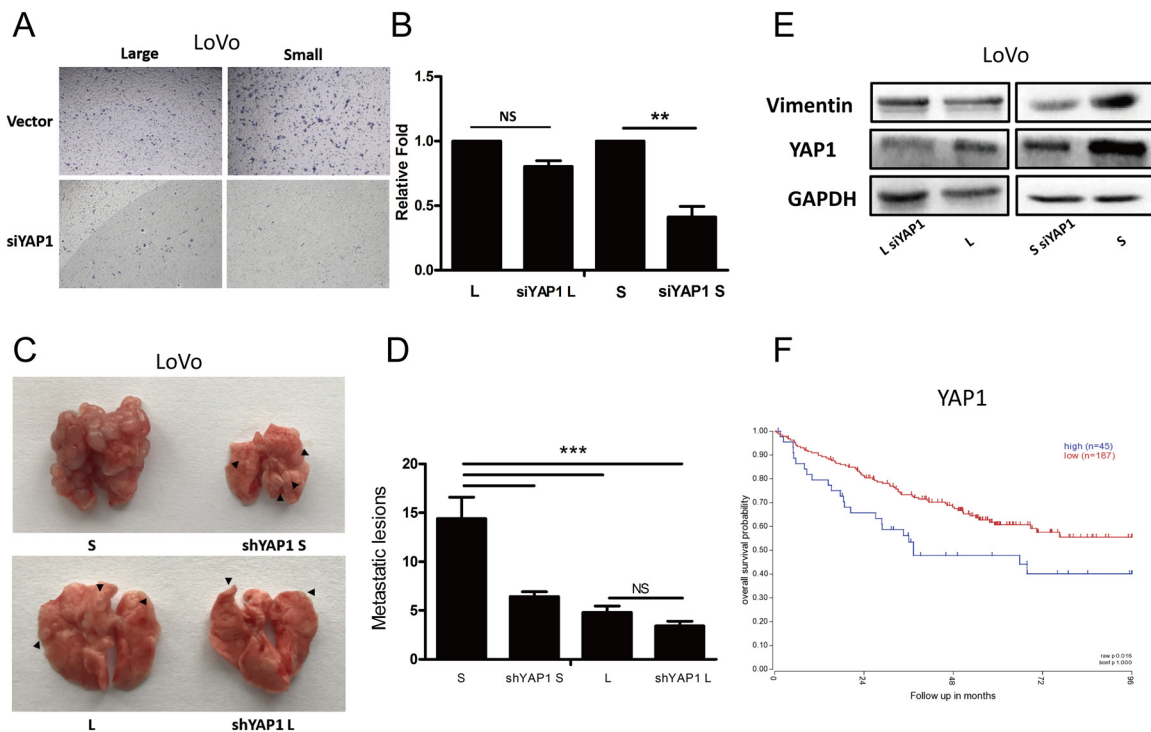

**Figure 6: YAP1 regulates tumorigenicity and lung metastatic potential in small cells but not large CRC cells. (A-B)** Transwell assays for large and small LoVo cells upon knocking down of YAP1. (L denotes large CRC cells, S denotes small CRC cells) Scale bars: 100  $\mu$ m. Data are presented as mean  $\pm$  SD; \*\* $P$  < 0.01. **(C-D)** Lung metastasis models of the effect of YAP1 knockdown. Representative images of lung metastases resulting from injection of large and small LoVo cells upon knocking down of YAP1 into NOD/SCID mice ( $n=6$  per group). Data are presented as mean  $\pm$  SD; \*\*\* $P$  < 0.001. **(E)** Protein levels of E-cadherin, Vimentin, YAP1 and CD133 were analyzed using western blotting in large and small LoVo cells upon knocking down of YAP1. GAPDH was used as a loading control. **(F)** Kaplan-Meier analysis of the correlation of YAP1 with overall survival in colorectal cancer patients.

and cell deformation [45] are also found to be involved in metastatic process. Compared to large-sized cells, small-sized cells might be more easily to penetrate through confining spaces in metastatic process since large cells may easily be caused to more nuclear rupture and hardly be deformation. Consistent with the studies, our data indicate that small CRC cells exhibit higher invasion capacity *in vitro* and metastatic capacity *in vivo* compared with large cells (Figure 4).

YAP1 regulates cell size and tissue growth [46]. It has previously been shown that YAP1 affects the stemness of tumor cells and promotes tumor metastasis [47]. Studies have demonstrated that Sox2 can enhance the function of YAP1 thus maintain the stemness of tumor cells [48]. Moreover, in ovarian cancer, YAP1 may promote self-renewal of TICs [49]. In addition, studies have shown that VEGF-C increases YAP1, down-regulates the expression of slug, and thus enhances the self-renewing capacity and metastatic potential of tumor cells [50]. Consistent with these observations, we found that the expression of YAP1 in small colorectal cancer cells was higher than the corresponding large cells, and furthermore, knockdown of YAP1 decreased the stemness (Figure 5D–5I) and metastatic capacity (Figure 6A–6D) of small CRC cells, while those were little affected in large CRC cells upon knocking down of YAP1.

In summary, our results provide rationale that novel therapeutics targeting YAP1 in small CRC cells should be developed to gain maximal clinical benefits.

## MATERIALS AND METHODS

### Cell lines and culture

Human colon cancer cells (HCT116, SW48, LoVo and HT-29) were purchased from American Type Culture Collection (ATCC), xhCRC were established and passaged as previously described [18]. In general, primary colorectal tumors were mechanically dissociated and digested in DMEM medium contained collagenase IV (Invitrogen, California, USA), hyaluronidase (Sigma, St. Louis, USA). Single tumor cells were obtained after filtered through a cell strainer (BD Falcon, CA, USA), incubated in red blood cell lysis buffer (eBioscience, California, USA), using to eliminate red blood cells. To establish xenograft tumor model, cells were implanted into female NOD/SCID mice subcutaneously. All the cell lines were grown in high glucose DMEM (Invitrogen, California, USA) with 10% fetal bovine serum (Gibco, NY, USA), 100µg/ml penicillin, and 100µg/ml streptomycin in a 5% CO<sub>2</sub> incubator at 37°C.

### Flow cytometry

All cells were first passed through a 30µm cell strainer to remove adherent cells, then large and small

cells were sorted by FACS (Aria II BD Biosciences, CA, USA). Generally, based on forward scatter (FSC), top 15% and bottom 15% gated cells were sorted out. Debris were removed by gates in the light scatter (LSC) versus FSC diagrams. To distinguish dead cells, cells were stained with propidium iodide (Sigma, USA). 3 cycles of sorting were performed in order to maximize purify large and small CRC cells. For cell cycle analyses, cells were fixed in 70% cold ethanol at 4°C for 12 hours, then incubated with RNase A working solution (0.25 mg/ml) and PI working solution (50µg/ml) for 30 min before FACS was performed.

### Clonal culture and sphere formation assay

Clonal culture and sphere formation assay were performed essentially as described previously [19]. To analyze clonal formation ability, 200 or 300 purified large and small cells were seeded in a six-well plate. Clones were stained and counted after 10 days of growth. For sphere formation assays, purified large and small cells were plated 100 or 200 cells per well in 24-well ultra-low attachment plates, after cultured in serum-free medium for one week, spheres > 50µm were counted. For Verteporfin (VP) (Sigma, St. Louis, USA) treatment, cells were treated in the dark with a concentration of 5µM. Cellular toxicity of VP (5µM) was < 8% in LoVo cells and 5% in HT-29 cells, respectively.

### Animal studies

Female NOD/SCID mice and BALB/c-nu mice (4–6 weeks of age) were purchased from Beijing HFK Bioscience CO., LTD. (Beijing, China). All experiments were strictly performed according to the relevant national and international guidelines, and approved by the Huazhong University of Science and Technology Animal Care Committee. For xenograft studies, cells suspended in PBS were mixed with the same volume Matrigel (BD Biosciences, CA, USA), then injected subcutaneously into BALB/c-nu mice at the volume of 100 µl [20]. 6 weeks later, tumors were harvested, tumor volumes and weight were examined. For metastasis assay, 5 x 10<sup>5</sup> cells suspended in 100µl PBS were injected into the tail vein of NOD/SCID mice. Animals were scarified 8 weeks later, metastatic burden was recorded.

### Transwell invasion assays

Cells were resuspended in 200µ DMEM medium without fetal bovine serum, then incubated into transwell chamber (8 µm pores; Corning, NY, USA) covered with Matrigel and 650µl DMEM medium (15% FBS) was added to the bottom of the chamber. 24hours later, cells on the lower surface of transwell insert were stained with 0.1% crystal violet and photographed by microscope

(Olympus). A total of 10 randomly selected fields in each transwell insert were evaluated.

## Immunohistochemistry

Basic procedures for immunohistochemistry of formalin-fixed paraffin-embedded sections were performed as previously described [19]. Eight fields were chosen in one slide by two experienced pathologists. Antibodies used for immunohistochemistry are as follows: anti-CK20 (Cell Signaling Technology, 13063, 1:100), anti-EpCAM (MiltenyiBiotec, 130-098-793, 1:100). Antibodies used for western blot are as follow: anti-GAPDH (abcam, ab9484, 1:1,000), anti-CD133 (MiltenyiBiotec, 130-092-395, 1:250), anti- E-Cadherin (CST #3195, 1:1,000), anti- Vimentin (CST #5741, 1:1,000), anti-YAP1 (abcam, 1674Y, 1:1,000).

## qRT - PCR

Basic protocols for RT-PCR analyses have been described [18]. Quantitative RT-PCR was performed using the SYBR-Green PCR master mix (Thermo Scientific, K0221) on ABI PRISM 7300 Sequence Detection System (Applied Biosystem). The PCR amplification is performed at the following conditions: 95°C for 10 min, followed by 40 cycles at 95°C for 15 s and 60°C for 1 min. Primers for the gene expression analysis are as follows: GAPDH: 5'-TCGTGGAAGGACTCATGACC-3' (forward) and 5'-TCCACCACCCTGTTGCTGTA-3 (reverse);CD133:5'- TTCTTGACCGACTGAGACCCA-3' (forward) and 5'- TCATGTTCTCCAACGCC TCTT-3' (reverse);YAP1:5'- TAGCCCTGCGTAGCCA GTTA-3' (forward) and 5'- TCATGCTTAGTCCACTGT CTGT-3' (reverse)

## Cell transfection

Cells were transiently transfected with 20µM scrambled siRNA or YAP1 siRNA designed and purchased from Ribobio (Guangzhou, China). Lipofectamine 2000 reagent (Invitrogen) was used for transfection according to the instructions provided by the manufacturer.

YAP1-shRNA lentivirus were purchased from Shanghai SBO Medical Biotechnology (Shanghai, China). Cells were seeded in 6-well plates 5 x10<sup>4</sup> per well 24h before transfection and infected with YAP1-shRNA lentivirus or vector for 3 days at MOI of 25.

## Bioinformatics and statistics analysis

Data were expressed as mean ± SD. Statistical differences was compared using Student's t-test and one-way ANOVA analysis. Survival analysis was performed using the Kaplan-Meier method by R2 web platform (<http://r2.amc.nl>). \*p<0.05, \*\*p<0.01 and \*\*\*p<0.001; NS represents no significant differences.

## Abbreviations

CRC, colorectal cancer; TICs, tumor-initiating cells; FACS, fluorescence-activated cell sorting; FSC, forward scatter; YAP1, yes-associated protein 1; xhCRC, human patient-derived CRC xenograft cell line; LDAs, limiting dilution assays; EMT, epithelial-mesenchymal transition.

## Author contributions

Conceived and designed the experiments: LM KH YH CY JQ. Performed the experiments: LM KH YH CY. Analyzed the data: LM KH YH CY XL JQ. Contributed reagents/materials/analysis tools: XL DT. Wrote the paper: LM JQ.

## ACKNOWLEDGMENTS

The authors thank animal facility of Tongji Medical College for animal experiments, and Department of Pathology of Tongji Hospital for immunohistochemistry. We apologize to the colleagues whose work was not cited due to space constraint.

## CONFLICTS OF INTEREST

The authors disclose no conflicts.

## FUNDING

This study was supported by grants from the National Natural Science Foundation of China (Nos. 81172065, 81272660, 81572894), Program for New Century Excellent Talents in University (No. NCET-12-0208), Scientific Research Foundation for the Returned Overseas Chinese Scholars, State Education Ministry (No.JYBHG201002), the Fundamental Research Funds for the Central Universities (HUST, No.01-18-540005) and Tongji Hospital Funds for the Returned Overseas Scientists and Outstanding Young Scientists (all to J. Q.).

## REFERENCES

1. Siegel RL, Miller KD, Fedewa SA, Ahnen DJ, Meester RG, Barzi A, Jemal A. Colorectal cancer statistics, 2017. *CA Cancer J Clin.* 2017; 67: 177-93.
2. Balic M, Lin H, Young L, Hawes D, Giuliano A, McNamara G, Datar RH, Cote RJ. Most early disseminated cancer cells detected in bone marrow of breast cancer patients have a putative breast cancer stem cell phenotype. *Clin Cancer Res.* 2006; 12: 5615-21.
3. Liu H, Patel MR, Prescher JA, Patsialou A, Qian D, Lin J, Wen S, Chang YF, Bachmann MH, Shimono Y, Dalerba P, Adorno M, Lobo N, et al. Cancer stem cells from human breast tumors are involved in spontaneous metastases in

- orthotopic mouse models. *Proc Natl Acad Sci U S A*. 2010; 107: 18115-20.
4. Hermann PC, Huber SL, Herrler T, Aicher A, Ellwart JW, Guba M, Bruns CJ, Heeschen C. Distinct populations of cancer stem cells determine tumor growth and metastatic activity in human pancreatic cancer. *Cell Stem Cell*. 2007; 1: 313-23.
  5. Pang R, Law WL, Chu AC, Poon JT, Lam CS, Chow AK, Ng L, Cheung LW, Lan XR, Lan HY, Tan VP, Yau TC, Poon RT, et al. A subpopulation of CD26+ cancer stem cells with metastatic capacity in human colorectal cancer. *Cell Stem Cell*. 2010; 6: 603-15.
  6. Coelho CM, Leever SJ. Do growth and cell division rates determine cell size in multicellular organisms? *J Cell Sci*. 2000; 113: 2927-34.
  7. Cadart C, Zlotek-Zlotkiewicz E, Le Berre M, Piel M, Matthews HK. Exploring the function of cell shape and size during mitosis. *Dev Cell*. 2014; 29: 159-69.
  8. Schmoller KM, Skotheim JM. The biosynthetic basis of cell size control. *Trends Cell Biol*. 2015; 25: 793-802.
  9. Stocker H, Hafen E. Genetic control of cell size. *Curr Opin Genet Dev*. 2000; 10: 529-35.
  10. Ginzberg MB, Kafri R, Kirschner M. Cell biology. On being the right (cell) size. *Science*. 2015; 348: 1245075.
  11. Berardi AC, Wang A, Levine JD, Lopez P, Scadden DT. Functional isolation and characterization of human hematopoietic stem cells. *Science*. 1995; 267: 104-8.
  12. Radley JM, Ellis S, Palatsides M, Williams B, Bertonecello I. Ultrastructure of primitive hematopoietic stem cells isolated using probes of functional status. *Exp Hematol*. 1999; 27: 365-9.
  13. Young HE, Duplaa C, Yost MJ, Henson NL, Floyd JA, Detmer K, Thompson AJ, Powell SW, Gamblin TC, Kizziah K, Holland BJ, Boev A, Van De Water JM, et al. Clonogenic analysis reveals reserve stem cells in postnatal mammals. II. Pluripotent epiblastic-like stem cells. *Anat Rec A Discov Mol Cell Evol Biol*. 2004; 277: 178-203.
  14. Virant-Klun I, Zech N, Rozman P, Vogler A, Cvjeticanin B, Klemenc P, Malicev E, Meden-Vrtovec H. Putative stem cells with an embryonic character isolated from the ovarian surface epithelium of women with no naturally present follicles and oocytes. *Differentiation*. 2008; 76: 843-56.
  15. Zuba-Surma EK, Kucia M, Abdel-Latif A, Dawn B, Hall B, Singh R, Lillard JW Jr, Ratajczak MZ. Morphological characterization of very small embryonic-like stem cells (VSELs) by ImageStream system analysis. *J Cell Mol Med*. 2008; 12: 292-303.
  16. Valastyan S, Weinberg RA. Tumor metastasis: molecular insights and evolving paradigms. *Cell*. 2011; 147: 275-92.
  17. Pantel K, Brakenhoff RH. Dissecting the metastatic cascade. *Nat Rev Cancer*. 2004; 4: 448-56.
  18. Yan C, Hu Y, Zhang B, Mu L, Huang K, Zhao H, Ma C, Li X, Tao D, Gong J, Qin J. The CEA-/lo colorectal cancer cell population harbors cancer stem cells and metastatic cells. *Oncotarget*. 2016; 7: 80700-15. <https://doi.org/10.18632/oncotarget.13029>.
  19. Qin J, Liu X, Laffin B, Chen X, Choy G, Jeter CR, Calhoun-Davis T, Li H, Palapattu GS, Pang S, Lin K, Huang J, Ivanov I, et al. The PSA(-/lo) prostate cancer cell population harbors self-renewing long-term tumor-propagating cells that resist castration. *Cell Stem Cell*. 2012; 10: 556-69.
  20. Hu Y, Yan C, Mu L, Huang K, Li X, Tao D, Wu Y, Qin J. Fibroblast-derived exosomes contribute to chemoresistance through priming cancer stem cells in colorectal cancer. *PLoS One*. 2015; 10: e0125625.
  21. Li H, Chen X, Calhoun-Davis T, Claypool K, Tang DG. PC3 human prostate carcinoma cell holoclones contain self-renewing tumor-initiating cells. *Cancer Res*. 2008; 68: 1820-5.
  22. Aguirre-Ghiso JA. Models, mechanisms and clinical evidence for cancer dormancy. *Nat Rev Cancer*. 2007; 7: 834-46.
  23. Martin-Padura I, Marighetti P, Agliano A, Colombo F, Larzabal L, Redrado M, Bleau AM, Prior C, Bertolini F, Calvo A. Residual dormant cancer stem-cell foci are responsible for tumor relapse after antiangiogenic metronomic therapy in hepatocellular carcinoma xenografts. *Lab Invest*. 2012; 92: 952-66.
  24. Bliss SA, Sinha G, Sandiford OA, Williams LM, Engelberth DJ, Guiro K, Isenalumhe LL, Greco SJ, Ayer S, Bryan M, Kumar R, Ponzio NM, Rameshwar P. Mesenchymal stem cell-derived exosomes stimulate cycling quiescence and early breast cancer dormancy in bone marrow. *Cancer Res*. 2016; 76: 5832-44.
  25. Ricci-Vitiani L, Lombardi DG, Pilozzi E, Biffoni M, Todaro M, Peschle C, De Maria R. Identification and expansion of human colon-cancer-initiating cells. *Nature*. 2007; 445: 111-5.
  26. O'Brien CA, Pollett A, Gallinger S, Dick JE. A human colon cancer cell capable of initiating tumour growth in immunodeficient mice. *Nature*. 2007; 445: 106-10.
  27. Melo FS, Kurtova AV, Harnoss JM, Kljavin N, Hoeck JD, Hung J, Anderson JE, Storm EE, Modrusan Z, Koepfen H, Dijkgraaf GJ, Piskol R, de Sauvage FJ. A distinct role for Lgr5+ stem cells in primary and metastatic colon cancer. *Nature*. 2017; 543: 676-80.
  28. Chen D, Wu M, Li Y, Chang I, Yuan Q, Ekimyan-Salvo M, Deng P, Yu B, Yu Y, Dong J, Szymanski JM, Ramadoss S, Li J, et al. Targeting BMI1+ cancer stem cells overcomes chemoresistance and inhibits metastases in squamous cell carcinoma. *Cell Stem Cell*. 2017; 20: 621-634.e6.
  29. Agliano A, Calvo A, Box C. The challenge of targeting cancer stem cells to halt metastasis. *Semin Cancer Biol*. 2017; 44: 25-42.
  30. Laplante M, Sabatini DM. mTOR signaling in growth control and disease. *Cell*. 2012; 149: 274-93.

31. Iritani BM, Eisenman RN. c-Myc enhances protein synthesis and cell size during B lymphocyte development. *Proc Natl Acad Sci U S A*. 1999; 96: 13180-5.
32. Tumaneng K, Russell RC, Guan KL. Organ size control by Hippo and TOR pathways. *Curr Biol*. 2012; 22: R368-79.
33. Gokhale RH, Shingleton AW. Size control: the developmental physiology of body and organ size regulation. *Wiley Interdiscip Rev Dev Biol*. 2015; 4: 335-56.
34. Meng Z, Moroishi T, Guan KL. Mechanisms of Hippo pathway regulation. *Genes Dev*. 2016; 30: 1-17.
35. Scheel C, Weinberg RA. Cancer stem cells and epithelial-mesenchymal transition: concepts and molecular links. *Semin Cancer Biol*. 2012; 22: 396-403.
36. Ohnuma K, Yomo T, Asashima M, Kaneko K. Sorting of cells of the same size, shape, and cell cycle stage for a single cell level assay without staining. *BMC Cell Biol*. 2006; 7: 25.
37. Hayama T, Yamaguchi T, Kato-Itoh M, Ishii Y, Mizuno N, Umino A, Sato H, Sanbo M, Hamanaka S, Masaki H, Hirabayashi M, Nakauchi H. Practical selection methods for rat and mouse round spermatids without DNA staining by flow cytometric cell sorting. *Mol Reprod Dev*. 2016; 83: 488-96.
38. Li Q, Rycaj K, Chen X, Tang DG. Cancer stem cells and cell size: a causal link? *Semin Cancer Biol*. 2015; 35: 191-9.
39. Miyanishi M, Mori Y, Seita J, Chen JY, Karten S, Chan CK, Nakauchi H, Weissman IL. Do pluripotent stem cells exist in adult mice as very small embryonic stem cells? *Stem Cell Reports*. 2013; 1: 198-208.
40. Weissman IL. Stem cells: units of development, units of regeneration, and units in evolution. *Cell*. 2000; 100: 157-68.
41. Tzur A, Kafri R, LeBleu VS, Lahav G, Kirschner MW. Cell growth and size homeostasis in proliferating animal cells. *Science*. 2009; 325: 167-71.
42. Bortolomai I, Canevari S, Facetti I, De Cecco L, Castellano G, Zacchetti A, Alison MR, Miotti S. Tumor initiating cells: development and critical characterization of a model derived from the A431 carcinoma cell line forming spheres in suspension. *Cell Cycle*. 2010; 9: 1194-206.
43. De Paiva CS, Pflugfelder SC, Li DQ. Cell size correlates with phenotype and proliferative capacity in human corneal epithelial cells. *Stem Cells*. 2006; 24: 368-75.
44. Denais CM, Gilbert RM, Isermann P, McGregor AL, te Lindert M, Weigelin B, Davidson PM, Friedl P, Wolf K, Lammerding J. Nuclear envelope rupture and repair during cancer cell migration. *Science*. 2016; 352: 353-8.
45. Chen J, Zhou W, Jia Q, Chen J, Zhang S, Yao W, Wei F, Zhang Y, Yang F, Huang W, Zhang Y, Zhang H, Zhang Y, et al. Efficient extravasation of tumor-repopulating cells depends on cell deformability. *Sci Rep*. 2016; 6: 19304.
46. Tumaneng K, Schlegelmilch K, Russell RC, Yimlamai D, Basnet H, Mahadevan N, Fitamant J, Bardeesy N, Camargo FD, Guan KL. YAP mediates crosstalk between the Hippo and PI(3)K-TOR pathways by suppressing PTEN via miR-29. *Nat Cell Biol*. 2012; 14: 1322-9.
47. Zanconato F, Cordenonsi M, Piccolo S. YAP/TAZ at the roots of cancer. *Cancer Cell*. 2016; 29: 783-803.
48. Basu-Roy U, Bayin NS, Rattanakorn K, Han E, Placantonakis DG, Mansukhani A, Basilico C. Sox2 antagonizes the Hippo pathway to maintain stemness in cancer cells. *Nat Commun*. 2015; 6: 6411.
49. Xia Y, Zhang YL, Yu C, Chang T, Fan HY. YAP/TEAD co-activator regulated pluripotency and chemoresistance in ovarian cancer initiated cells. *PLoS One*. 2014; 9: e109575.
50. Yeh YW, Cheng CC, Yang ST, Tseng CF, Chang TY, Tsai SY, Fu E, Chiang CP, Liao LC, Tsai PW, Yu YL, Su JL. Targeting the VEGF-C/VEGFR3 axis suppresses Slug-mediated cancer metastasis and stemness via inhibition of KRAS/YAP1 signaling. *Oncotarget*. 2017; 8: 5603-18. <https://doi.org/10.18632/oncotarget.13629>.
